# Supplementary material for: Inner nuclear envelope protein SUN1 plays a prominent role in mammalian mRNA export
Source: PubMed Central journal article supplement — Nucleic Acids Res. 2015 Oct 17;43(20):9874–88. doi: 10.1093/nar/gkv1058 (PMC4787764; doi:10.1093/nar/gkv1058), 2015-10-17
Supplement: supp_gkv1058_nar-01452-y-2015-File009.pdf [file supp_gkv1058_nar-01452-y-2015-File009.pdf]

Supplementary material:

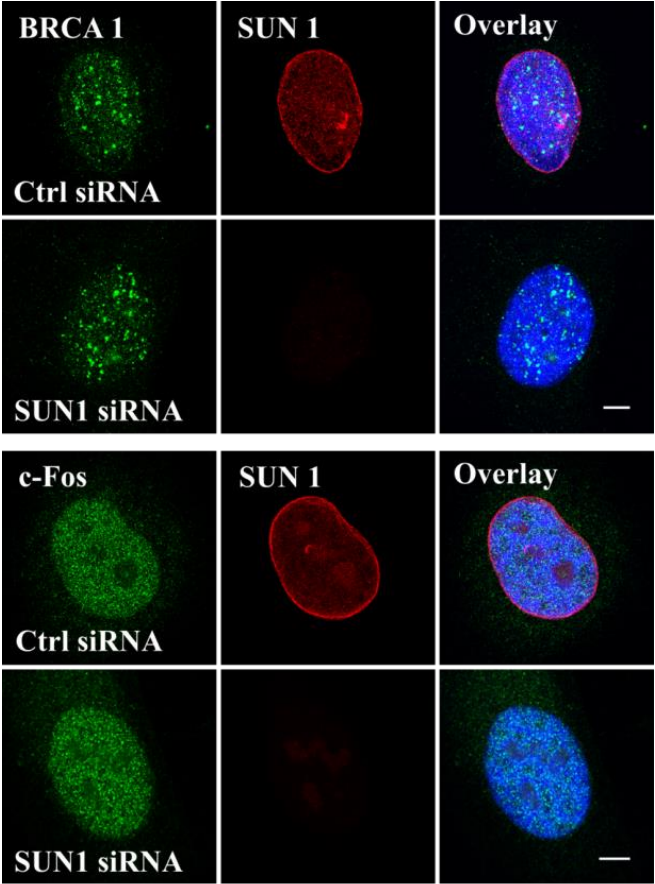

Figure S1

Figure S1. The immunofluorescence staining of BRCA1 and c-Fos in control and SUN1 siRNA cells. Bar: 5µm.
